1 ABSTRACT

2 A well-coordinated control of motor neuronal persistent inward currents (PICs) via diffuse  
3 neuromodulation and local inhibition is essential to ensure motor units discharge at required  
4 times and frequencies. Current best estimates indicate that PICs are reduced in older adults;  
5 however, it is not yet known whether PIC facilitation-inhibition control is also altered with  
6 ageing. We investigated the responses of PICs to i) a remote handgrip contraction, which is  
7 believed to diffusely increase serotonergic input onto motor neurones, and ii) tendon  
8 vibration of the antagonist muscle, which elicits reciprocal inhibition, in both young and  
9 older adults. High-density surface electromyograms were collected from *soleus* and *tibialis*  
10 *anterior* of 18 young and 26 older adults during triangular-shaped plantar and dorsiflexion  
11 contractions to 20% (handgrip experiments) and 30% (vibration experiments) of maximum  
12 torque (rise-decline rate of 2%/s). The paired-motor-unit analysis was used to calculate  $\Delta F$ ,  
13 which is assumed proportional to PIC strength.  $\Delta F$  increased in both *soleus* (0.55pps, 16.0%)  
14 and *tibialis anterior* (0.42pps, 11.4%) during the handgrip contraction independent of age.  
15 However, although antagonist tendon vibration reduced  $\Delta F$  in *soleus* (0.28pps, 12.6%)  
16 independent of age, less reduction was observed in older (0.42pps, 10.7%) than young adults  
17 (0.72pps, 17.8%) in *tibialis anterior*. Our data indicate a preserved ability of older adults to  
18 amplify PICs following a remote handgrip contraction, during which increased serotonergic  
19 input onto the motor neurones is expected, in both lower leg muscles. However, PIC  
20 deactivation in response to reciprocal inhibition was impaired with ageing in *tibialis anterior*  
21 despite being preserved in *soleus*.

22 Keywords: motoneuron, motor unit, reciprocal inhibition, ageing,  $\Delta F$

23

1 KEYPOINTS

2

3 • Motor neuronal persistent inward currents (PICs) are amplified via diffuse  
4 neuromodulation and deactivated by local inhibition to ensure motor units discharge  
5 at required times and frequencies, allowing a normal motor behaviour.

6

7 • PIC amplitudes appear to be reduced with ageing, however it is not known whether  
8 PIC facilitation-inhibition control is also altered.

9

10 • Remote handgrip contraction, which should diffusely increase serotonergic input onto  
11 motor neurones, amplified PICs similarly in both *soleus* and *tibialis anterior* of young  
12 and older adults.

13

14 • Antagonist tendon vibration, which induces reciprocal inhibition, reduced PICs in  
15 *soleus* in both young and older adults but had less effect in *tibialis anterior* in older  
16 adults.

17

18 • Our data suggest that older adults have preserved *soleus* PIC facilitation during low-  
19 intensity contractions, equivalent to activities such as standing and walking. However,  
20 a reduced reciprocal inhibition of PICs in *tibialis anterior* may contribute to  
21 locomotion impairments, such as increases in *soleus-tibialis anterior* co-activation  
22 during propulsion.

23

## 1 INTRODUCTION

2 Persistent inward currents (PICs), generated by voltage-gated sodium and calcium  
3 channels within the motor neurones, enable amplification and prolongation of excitatory  
4 synaptic input (Heckman *et al.*, 2005). Motor neurones can adjust PIC strength via a fine  
5 control between neuromodulation and inhibition according to the desired task demands  
6 (Heckman *et al.*, 2005). This neuromodulatory control of PICs is dictated by the amount of  
7 serotonin and noradrenaline released from the brainstem nuclei and delivered onto the motor  
8 neurone dendrites, activating slow activating L-type  $\text{Ca}^{2+}$  and fast activating persistent  $\text{Na}^{+}$   
9 currents (Heckman *et al.*, 2008). It has also been suggested that monoaminergic projections  
10 to the spinal cord vary their activity proportional to the demand (e.g., intensity) of the  
11 performed motor activity. Thus, the stronger PIC amplification observed in higher intensity  
12 activities (Orssatto *et al.*, 2021b) could theoretically result from a higher monoaminergic  
13 input onto the motor neurones (Lee & Heckman, 1999, 2000; Heckman *et al.*, 2005).  
14 However, the descending monoaminergic projections are highly diffuse, resulting in  
15 increased excitation of diverse muscle groups, including those not involved in the desired  
16 tasks (Heckman *et al.*, 2008; Wei *et al.*, 2014). For example, contraction of one muscle group  
17 triggers a serotonergic-mediated increase in motor neuronal gain in other, unrelated muscles  
18 (Wei *et al.*, 2014). Alternatively, deactivation of undesired PICs in specific motor neurones  
19 can be achieved by local inhibitory circuits in the spinal cord. PICs are highly sensitive to  
20 inhibition and are thus turned off by inhibitory input (Hounsgaard *et al.*, 1988; Hultborn *et al.*,  
21 2003; Kuo *et al.*, 2003; Revill & Fuglevand, 2017; Mesquita *et al.*, 2022; Pearcey *et al.*,  
22 2022). For example, reciprocal inhibition can deactivate PICs from the antagonist muscles  
23 (Hynstrom *et al.*, 2007; Vandenberk & Kalmar, 2014; Mesquita *et al.*, 2022; Pearcey *et al.*,  
24 2022), avoiding undesirable coactivations. Thus, a well-coordinated control of PICs via  
25 diffuse activation and local deactivation is essential to ensure motor units discharge at desired  
26 times and frequencies, allowing normal motor behaviour (Heckman *et al.*, 2008).

27 Age-related alterations within the nervous system (Manini *et al.*, 2013; Orssatto *et al.*,  
28 2018) contribute to the impairments in movement control and force production observed in  
29 older individuals (Suetta *et al.*, 2019). Recent estimates suggest that reduced motor neuronal  
30 PIC strength plays a role in these impairments (Hassan *et al.*, 2021; Orssatto *et al.*, 2021a).  
31 However, it is not known whether PIC neuromodulation-inhibition control is also altered with  
32 ageing. Older adults present dysfunctions within the monoaminergic system and inhibitory  
33 circuits that could contribute to both inefficient monoaminergic neuromodulation and  
34 localised effects of inhibition on PICs (Johnson *et al.*, 1993; Ko *et al.*, 1997; Míguez *et al.*,

1 1999; Kido *et al.*, 2004; Hortobágyi *et al.*, 2006; Shibata *et al.*, 2006; Liu *et al.*, 2020;  
2 Steinbusch *et al.*, 2021), hence potentially contributing to impairments in motor control in  
3 this population. Detrimental effects of ageing on the monoaminergic system as well as  
4 chronic inflammation reduce serotonin and noradrenaline secretions and thus input onto the  
5 motoneurons (Johnson *et al.*, 1993; Ko *et al.*, 1997; Míguez *et al.*, 1999; Shibata *et al.*, 2006;  
6 Liu *et al.*, 2020; Steinbusch *et al.*, 2021), which would impair neuromodulation and attenuate  
7 PIC amplification. With respect to inhibitory circuits, older adults have reduced cortical and  
8 spinal reciprocal inhibition (Kido *et al.*, 2004; Hortobágyi *et al.*, 2006), which could impair  
9 PIC inhibition, generating undesired muscle contractions such as the observed age-related  
10 increases in antagonist coactivation (Macaluso *et al.*, 2002; Hortobágyi & Devita, 2006;  
11 Hortobágyi *et al.*, 2009)). Exploring the dynamics of PIC neuromodulation and inhibition in  
12 older adults could provide therefore important insight into factors underpinning impaired  
13 movement control (e.g., locomotion) in this population.

14 In the present study, the responses of PICs to i) a remote handgrip contraction, which  
15 is believed to diffusely increase serotonergic input onto motor neurones, and ii) reciprocal  
16 inhibition, which induces reciprocal inhibition, were estimated in *soleus* and *tibialis anterior*  
17 of young and older adults using the gold-standard paired motor unit technique (Gorassini *et al.*  
18 *et al.*, 2002; Vandenberg & Kalmar, 2014). To answer these questions, the study involved two  
19 experiments. In Experiment 1 we estimated PICs after a remote contraction with upper limb  
20 muscles not involved in the *soleus*- and *tibialis anterior*-targeting tasks, theoretically  
21 inducing increases in serotonergic input onto the motor neurones by taking advantage of their  
22 diffuse descending monoaminergic projections into the spinal cord (Heckman *et al.*, 2008;  
23 Wei *et al.*, 2014). In Experiment 2, we estimated PIC strength while activating a well-known  
24 disynaptic reciprocal inhibition circuit using tendon vibration of the antagonist muscle  
25 (Pearcey *et al.*, 2022), which activates Ia inhibitory inter neurones via antagonist Ia afferent  
26 stimulation by stimulating its muscle spindles (Burke *et al.*, 1976; Grande & Cafarelli, 2003;  
27 Pearcey *et al.*, 2022). We hypothesised that i) older adults would present smaller PIC  
28 increases than young adults in response to a remote handgrip contraction, and ii) older adults  
29 would present reduced attenuation of PICs in response to reciprocal inhibition, irrespective of  
30 the tested muscles. *Soleus* and *tibialis anterior* were chosen in this study due to their  
31 important antagonist co-involvement in postural stability and locomotion (Polcyn *et al.*,  
32 1998; Laughton *et al.*, 2003; Hortobágyi & Devita, 2006).

33  
34

## 1 METHODS

### 2 **Participants and Ethical Procedures**

3 Eighteen young adults aged 18-35 years and 26 non-sarcopenic older adults aged  $\geq 65$  years  
4 volunteered to the present study. They had no history of neurological disorders, were free of  
5 lower limb musculoskeletal injuries, and were not taking medications that could influence the  
6 monoaminergic system, including serotonin or noradrenaline modulators (e.g., beta-blockers  
7 and serotonin reuptake inhibitors). They were instructed to not consume caffeinated foods or  
8 beverages 24 h before the testing session. One young and one older adult were excluded from  
9 the study because no motor units were identified in *soleus* and *tibialis anterior*. The  
10 participants had already completed a previous study in our laboratory from other tests  
11 conducted within the same visit, before the procedures of the present study were imposed.  
12 Further participant characteristics and other variables can be found in that publication  
13 (Orssatto *et al.*, 2021a). This study was approved by the University Human Research Ethics  
14 Committee, and all participants gave written informed consent before participating. Data  
15 collection was conducted during the COVID-19 pandemic and all safety procedures followed  
16 the local state government policies.

17

### 18 **Study design and testing procedures**

19 Participants visited the laboratory on a single occasion. Initially, participants performed a  
20 warm-up and three plantar flexion, dorsiflexion, and handgrip maximal voluntary isometric  
21 contractions (MVC, ~3-s with 30-s rest intervals) and were familiarised to the submaximal  
22 ramped contractions. Subsequently, they performed four submaximal ramp-shaped  
23 contractions, which have been already analysed and the data published (Orssatto *et al.*,  
24 2021a). After 10 min of rest, the procedures from the present study were conducted. The  
25 present cross-sectional study was divided into two experiments testing plantar and  
26 dorsiflexion tasks, which are described below. In Experiments 1 and 2, participants were  
27 seated upright in the chair of an isokinetic dynamometer (Biodex System 4, Biodex Medical  
28 system, Shirley, NY) with the knee fully extended ( $0^\circ$ ) and ankle in anatomical position ( $0^\circ$ ).

29

#### 30 *Experiment 1*

31 Participants performed two sets of two ramp-shaped contractions to 20% of their peak torque  
32 (10-s up and 10-s down), interspersed by an ipsilateral remote handgrip contraction or resting  
33 control condition (Figure 1A). Contracting a muscle unrelated to the tested task is a non-  
34 invasive method to induce serotonergic-mediated gain on the tested muscle (Wei *et al.*,

1 2014). The remote handgrip contraction was preceded by a 10-s preparation period, followed  
2 by a 30-s contraction to 40% of their maximal handgrip force. Participants were asked to  
3 avoid any movement (i.e., muscle contraction) during the resting control condition, which  
4 lasted 40 s. The subsequent ramp-shaped contractions were performed immediately after the  
5 remote handgrip or resting control conditions (i.e., remote contraction was ceased before  
6 plantar- or dorsiflexion contractions commenced so dual tasking was avoided). The order in  
7 which each condition was performed and which each muscle was tested were randomised.  
8 Participants received real-time visual torque-trace feedback during each contraction and were  
9 instructed to follow the torque path displayed on a 58-cm computer monitor. When an abrupt  
10 increase or decrease in torque was observed (i.e., the torque trajectory was not closely  
11 followed), the whole trial was excluded and repeated 2 min later.

12

### 13 *Experiment 2*

14 Participants performed six ramp-shaped contractions to 30% of their peak torque at a rate of  
15 torque rise and decline of 2%/s (15-s up and 15-s down). Three contractions were performed  
16 with high-frequency vibration applied to the tendon of the antagonist muscles and three with  
17 the vibrator device turned off (i.e., control condition). Conditions were alternated in a  
18 randomised order, interspersed by 1-min rest intervals (Figure 1B). Tendon vibration (115  
19 Hz, Vibrasens Proprioceptive Technology, France) was applied to the Achilles tendon during  
20 the dorsiflexion contractions and to the *tibialis anterior* tendon during the plantar flexion  
21 contractions. Vibration commenced 10 s before the start of the ramp-shaped contraction and  
22 continued until 2 s after the torque trace returned to baseline, and was thus imposed through  
23 the duration of the ramp contraction.

24

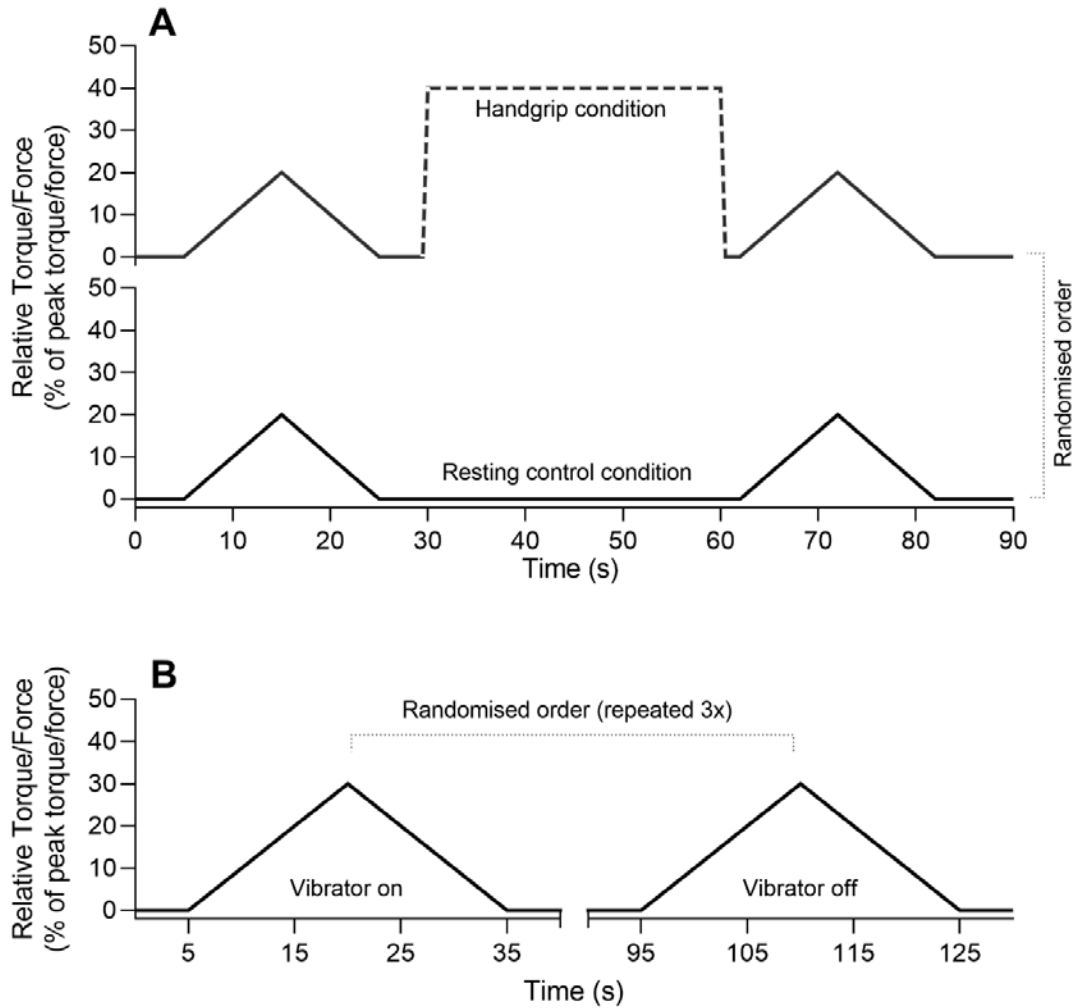

1

2 **Figure 1.** Design of Experiments 1 and 2. Panel A presents Experiment 1 design with the  
3 handgrip condition shown at top and control condition at bottom. Panel B shows Experiment  
4 2 design.

5

## 6 **Surface electromyography**

7 Skin preparation included shaving, abrasion, and cleansing each site with 70%  
8 isopropyl alcohol. Two semi-disposable 32-channel electrode grids with a 10-mm  
9 interelectrode distance (ELSCH032NM6, OTBioelettronica, Torino, Italy) were placed over  
10 the medial and lateral portions of *soleus* (either side of the Achilles tendon) and another two  
11 electrode grids were placed over the superior and inferior aspect of *tibialis anterior* using a  
12 bi-adhesive foam layer and conductive paste (Ten20, Weaver and Company, CO, USA). A  
13 dampened strap electrode (WS2, OTBioelettronica, Torino, Italy) was positioned around the  
14 ankle joint as a ground electrode. Surface electromyograms (sEMG) were recorded during the



1 submaximal ramp-shaped contractions. The sEMG signals were acquired in monopolar mode,  
2 amplified (256×), band-pass filtered (10–500 Hz), and converted to a digital signal at 2048  
3 Hz by a 16-bit wireless amplifier (Sessantaquattro, OTBio- elettronica, Torino, Italy) using  
4 OTBioLab+ software (version 1.3.0., OTBIOelettronica, Torino, Italy) before being stored for  
5 offline analysis.

6

## 7 **Motor unit analyses**

### 8 *Motor unit identification*

9 The recorded data were processed offline using the DEMUSE software (Holobar & Zazula,  
10 2007). For each muscle from Experiment 1, only the pair of ramp-shaped contractions  
11 yielding the lowest deviation from torque trajectory were analysed for the handgrip or resting  
12 control conditions. The same was adopted on Experiment 2, in which only the motor units  
13 from one pair of ramp-shaped contractions (vibration and control conditions) yielding the  
14 lowest deviation from torque trajectory were analysed. If pairs of contractions presented a  
15 similar torque trajectory, the pair with the highest number of identified motor units was  
16 analysed. High-density sEMG signals were band-pass filtered (20–500 Hz) with a second-  
17 order, zero-lag Butterworth filter. Thereafter, a blind source separation method, the  
18 convolutive kernel compensation (CKC) method, was used for signal decomposition  
19 (Holobar & Zazula, 2007; Holobar *et al.*, 2014) from each triangular contraction. CKC yields  
20 the filters of individual motor units that, when applied to high-density sEMG signals,  
21 estimate the motor unit spike trains (Holobar & Zazula, 2007; Holobar *et al.*, 2014). The  
22 motor unit filters were used to identify the same motor unit across different time points. In  
23 Experiment 1, motor units were tracked before and after the handgrip or resting control  
24 conditions, but not between each condition. In Experiment 2, motor units were tracked  
25 between the vibrator on and vibrator off conditions. The motor unit filters identified by  
26 convolutive kernel compensation at individual contractions on each time point were applied  
27 to the concatenated high-density sEMG signals recorded at other time points. Afterwards,  
28 motor unit filters identified from each time point were applied to the concatenated recordings  
29 (Frančič & Holobar, 2021, 2022) yielding the motor unit spike trains of all the identified  
30 motor units across all the concatenated time points. After removing motor unit duplicates  
31 simultaneously identified from two time points a trained investigator manually inspected  
32 motor unit spike trains and edited the discharge patterns of the motor units. Only motor units  
33 visually inspected and with a pulse-to-noise ratio equal to or greater than 30 dB were kept for  
34 further analysis (Holobar *et al.*, 2014).

1

2 *Estimation of PIC strength ( $\Delta F$ ) and peak discharge rates*

3 The observed discharge events for each motor unit were converted into instantaneous  
4 discharge rates and fitted into a 5<sup>th</sup>-order polynomial function. PIC strengths were estimated  
5 using the paired motor unit analysis (Gorassini *et al.*, 2002). Motor units with a low  
6 recruitment threshold (i.e., control units) were paired with higher recruitment threshold motor  
7 units (i.e., test units).  $\Delta F$  was calculated as the change in discharge rates of the control motor  
8 unit from the moment of recruitment to the moment of de-recruitment of the test unit  
9 (Gorassini *et al.*, 2002). Motor unit pairs were composed of motor units with a rate-to-rate  
10 correlations between the smoothed discharge rate polynomials of  $r \geq 0.7$  and the test units  
11 were recruited at least 1.0 s after the control units (Gorassini *et al.*, 2002; Hassan *et al.*,  
12 2020).  $\Delta F$ s obtained for each control unit were averaged to obtain a single  $\Delta F$  for each test  
13 motor unit.  $\Delta F$ s for the motor units tracked over time were derived from the same pairs of  
14 motor units on each condition (i.e., Experiment 1, between before and after handgrip or  
15 resting control conditions, and Experiment 2, between vibrator on and vibrator off  
16 conditions). The maximum value obtained from the polynomial curve was considered the  
17 peak discharge rate. The relative torque (%) produced at the time in each motor unit was  
18 recruited was considered the recruitment threshold. Figure 2 shows an example of paired  
19 motor unit analysis used to calculate  $\Delta F$  from a single test unit using three control units.

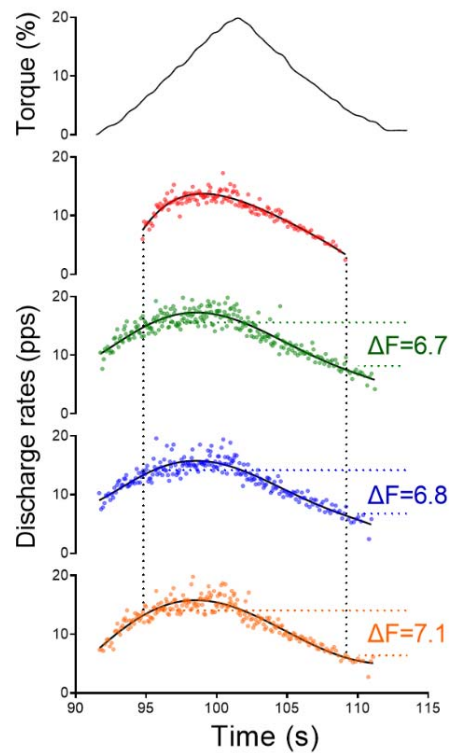

Test unit  $\Delta F$  calculation

$$\Delta F = \frac{(6.7 + 6.8 + 7.1)}{3}$$

3

$$\Delta F = 6.9$$

1

2 Figure 2. Data illustrating the  $\Delta F$  calculation using paired motor unit analysis. The top panel  
3 shows the torque traces for contractions to 20% of the participant's dorsiflexion maximal  
4 voluntary torque. The subsequent panels display a *tibialis anterior* test motor unit (red  
5 colour) and three control units (green, blue, and orange colours). The black continuous lines  
6 are the 5th-order polynomial fits for the control units. The  $\Delta F$ s obtained from each control  
7 unit were averaged, resulting in a single value for the test unit.

8

## 9 Data analyses

10 In Experiment 1, separate linear mixed-effect models were used for each muscle to  
11 compare  $\Delta F$ , peak discharge rates, and recruitment thresholds between conditions (i.e.,  
12 control and handgrip), age groups (i.e., older and young adults), and over time (i.e., before  
13 and after handgrip or control conditions), used as a fixed factors (Yu *et al.*, 2021). Additional  
14 linear mixed-effect models were used to compare  $\Delta F$  mean differences (after – before  
15 handgrip or control conditions) between conditions and age groups to remove the time factor

1 from the model, and results are presented in Supplementary Material 1. In Experiment 2,  
2 linear mixed-effect models were used to compare  $\Delta F$ , peak discharge rates, and recruitment  
3 thresholds between conditions (i.e., control and vibrator), used as a fixed factors (Yu *et al.*,  
4 2021). For both experiments, *soleus* and *tibialis anterior* were fitted to separate statistical  
5 models. Single motor units were treated as repeated measures, nested according to each  
6 participant, and a random intercept was included for each participant in the study to account  
7 for the correlation between repeated observations on each individual (i.e., 1| participant/motor  
8 unit ID). When a significant effect was observed, Bonferroni post-hoc correction was adopted  
9 for pairwise comparison. The effect sizes derived from the F ratios were calculated with the  
10 omega squared ( $\omega^2$ ) method (0–0.01, very small; 0.01–0.06, small; 0.06–0.14, moderate; and  
11 >0.14, large) (Lakens, 2013). Intraclass correlation coefficient (ICC) and standard error of  
12 measurement (SEM) were calculated between  $\Delta F$  before and after the control condition from  
13 Experiment 1. The standardised difference (Cohen’s *d*) between time points was also  
14 calculated using the population standard deviation from each respective linear mixed-effects  
15 model as the denominator (Lenth *et al.*, 2021). All analyses were completed in R (version  
16 4.0.5) using the RStudio environment (version 1.4.1717). Linear mixed-effects models were  
17 fitted using the lmerTest package (Kuznetsova *et al.*, 2017). Estimated marginal mean  
18 differences and 95% confidence intervals between time points were determined using the  
19 emmeans package (Lenth *et al.*, 2021). Significant difference was accepted at  $p \leq 0.05$ . All  
20 descriptive data are presented as mean (95% confidence interval lower and upper limits),  
21 unless indicated differently. The dataset and R code can be found at  
22 [https://github.com/orssatto/PICs-ageing\\_2.0](https://github.com/orssatto/PICs-ageing_2.0).

23  
24

## 1 RESULTS

### 2 **Experiment 1**

3 In summary,  $\Delta F$  and peak discharge rates were increased in motor units of young and older  
4 adults following the handgrip condition but not the control condition. These results were  
5 observed in both *soleus* and *tibialis anterior*, independent of age. Recruitment threshold did  
6 not change in *soleus*, independent of age, but increased in *tibialis anterior* in older adults  
7 only. Descriptive statistics for each group, condition, time point, and muscle are presented in  
8 Table 1.

9

#### 10 *Estimates of PICs ( $\Delta F$ )*

11 For *soleus*, a time by condition interaction on  $\Delta F$  ( $F = 19.27$ ,  $\omega^2 = 0.05$ ,  $p < 0.001$ ), but not a  
12 time by condition by age interaction ( $F < 0.01$ ,  $\omega^2 < 0.001$ ,  $p = 0.967$ ), was detected.  $\Delta F$  did  
13 not change over time in the control condition [mean difference (md) = -0.10 (-0.28, 0.09) pps,  
14  $d = -0.17$  (-0.41, 0.08),  $p = 0.17$ ] but increased in the handgrip condition [md = 0.37 (0.16,  
15 0.57) pps,  $d = 0.62$  (0.35, 0.90),  $p < 0.001$ ]. Before the interventions,  $\Delta F$  was not different  
16 between the control and handgrip conditions [md = -0.09 (-0.30, 0.13),  $d = -0.15$  (-0.43,  
17 0.14),  $p = 0.292$ ]. However,  $\Delta F$  was higher in the handgrip condition than the control  
18 condition after the intervention [md = 0.55 (0.34, 0.77),  $d = 0.932$  (0.64, 1.22),  $p < 0.001$ ].  
19 ICC for  $\Delta F$  measured before and after the control condition was 0.939 (0.893, 0.965) and  
20 SEM was 0.219 pps.

21 For *tibialis anterior*, there was a time by condition interaction on  $\Delta F$  for *tibialis anterior* ( $F =$   
22  $23.81$ ,  $\omega^2 = 0.03$ ,  $p < 0.001$ ) but not a time by condition by age interaction ( $F = 0.76$ ,  $\omega^2 <$   
23  $0.001$ ,  $p = 0.385$ ).  $\Delta F$  did not change over time in the control condition [md = -0.05 (-0.21,  
24 0.11) pps,  $d = -0.07$  (-0.24, 0.10),  $p = 0.399$ ], but increased in the handgrip condition [md =  
25 0.42 (0.23, 0.59) pps,  $d = 0.55$  (0.35, 0.74),  $p < 0.001$ ]. Before the interventions,  $\Delta F$  was not  
26 different between control and handgrip conditions [md = -0.01 (-0.20, 0.17) pps,  $d = -0.02$  (-  
27 0.22, 0.18),  $p = 0.838$ ]. However,  $\Delta F$  was higher in the handgrip than the control condition  
28 after the interventions [md = 0.64 (0.44, 0.84) pps,  $d = 0.61$  (0.40, 0.81),  $p < 0.001$ ]. ICC for  
29  $\Delta F$  measured before and  $\Delta F$  after the control condition was 0.898 (0.819, 0.944) and SEM  
30 was 0.372 pps.

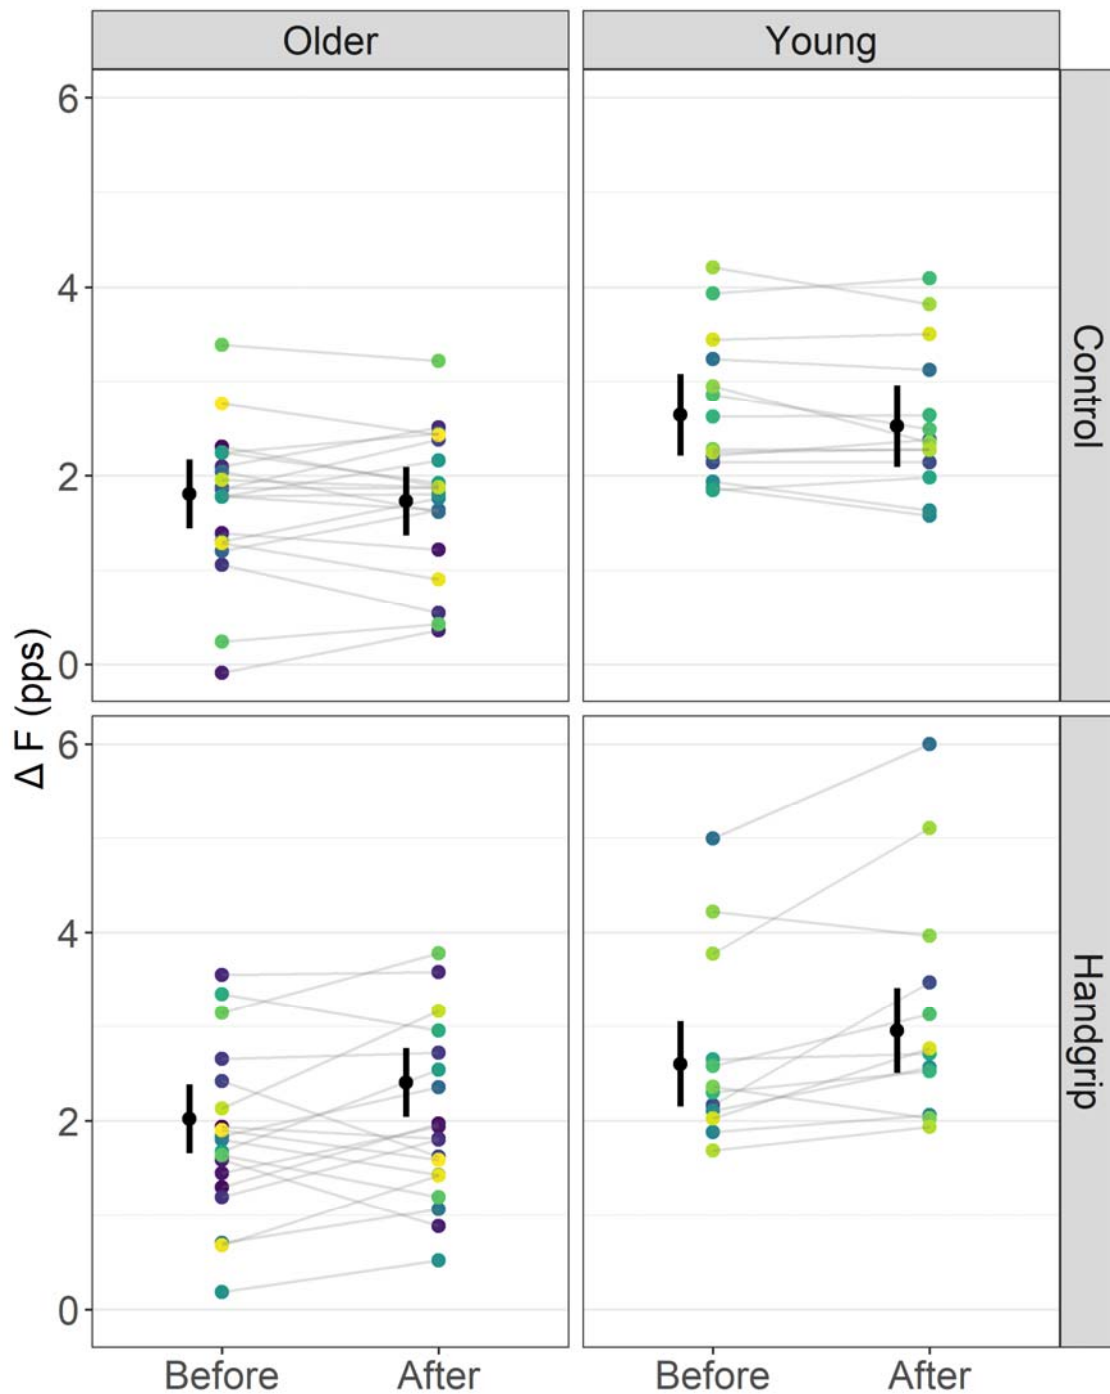

1

2 Figure 3. *Soleus*  $\Delta F$  outcomes in control and handgrip conditions for older and young adults.  
3 Note that  $\Delta F$  remained unchanged before and after the control condition but increased in the  
4 handgrip condition in both older and young adults. The mean (black circle) and 95%  
5 confidence intervals are offset to the left. Individual data points (average  $\Delta F$  per participant)  
6 are coloured by participants. pps = peaks per second.

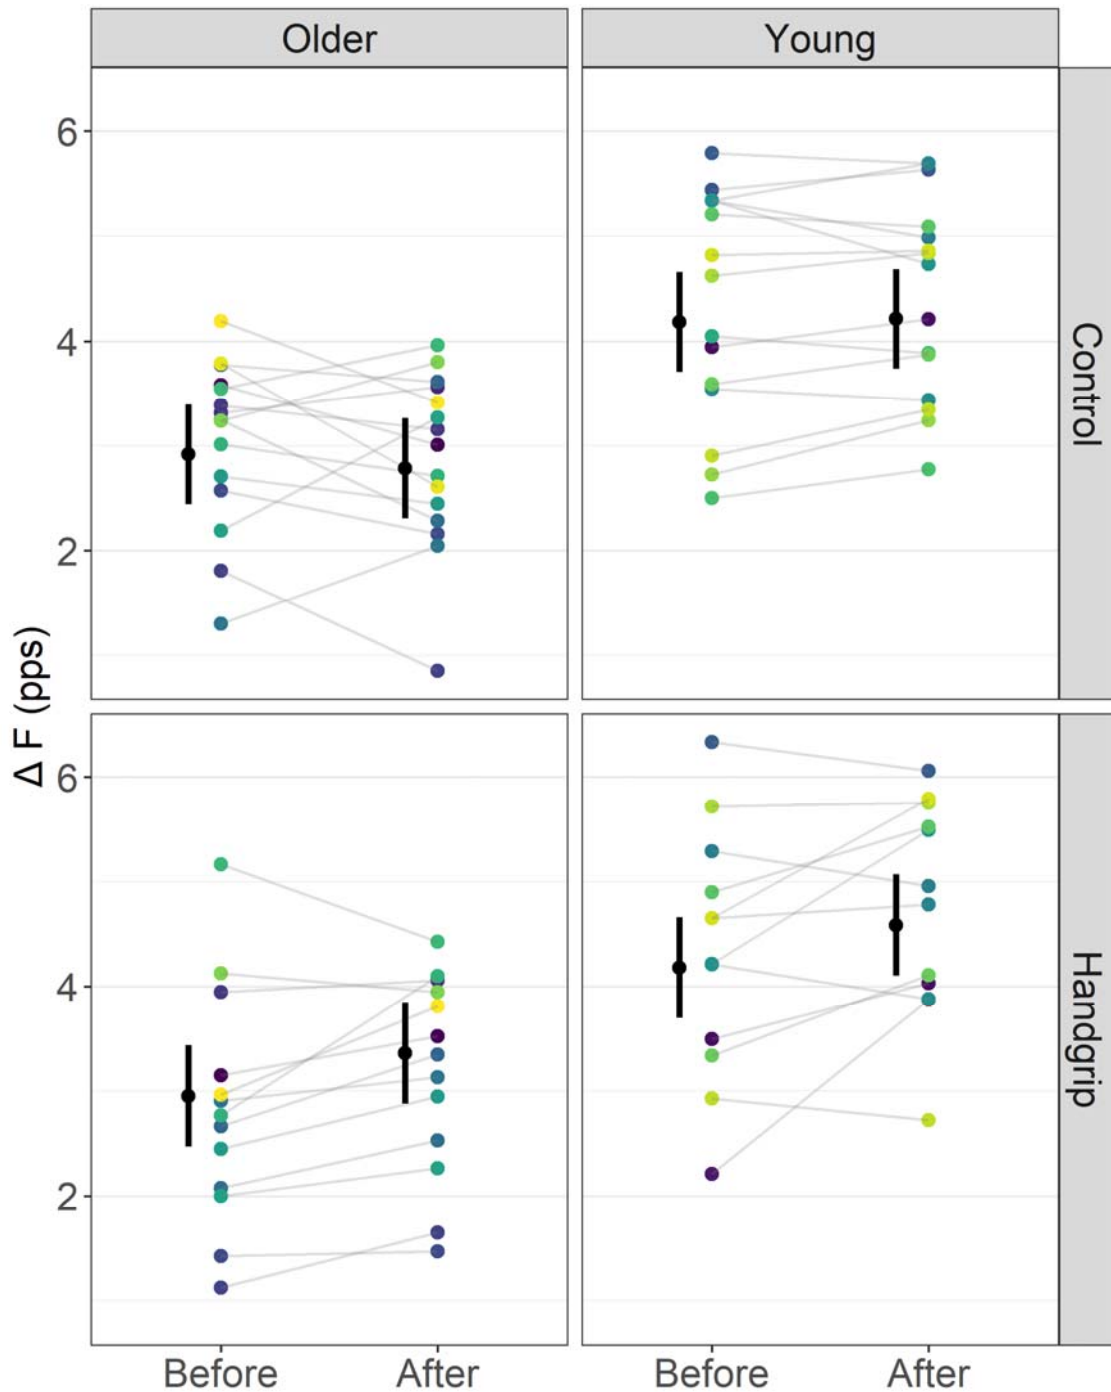

1

2 Figure 4. *Tibialis anterior*  $\Delta F$  outcomes in control and handgrip conditions for older and  
3 young adults. Note that  $\Delta F$  remained unchanged before and after the control condition but  
4 increased in the handgrip condition in both older and young adults. The mean (black circle)  
5 and 95% confidence intervals are offset to the left. Individual data points (average  $\Delta F$  per  
6 participant) are coloured by participants. pps = peaks per second.

1 *Peak discharge rates*

2 For *soleus*, a time by condition interaction ( $F = 18.52$ ,  $\omega^2 = 0.05$ ,  $p < 0.001$ ), but not a time by  
 3 condition by age interaction ( $F = 3.02$ ,  $\omega^2 < 0.001$ ,  $p = 0.083$ ), was detected. Peak discharge  
 4 rates did not change over time in the control condition [md = -0.02 (-0.18, 0.15) pps,  $d = -$   
 5 0.03 (-0.27, 0.21),  $p = 0.812$ ] but increased in the handgrip condition [md = 0.40 (0.21, 0.59)  
 6 pps,  $d = 0.74$  (0.47, 1.02),  $p < 0.001$ ]. For *tibialis anterior*, there was a time by condition  
 7 interaction ( $F = 15.57$ ,  $\omega^2 = 0.02$ ,  $p < 0.001$ ) but no time by condition by age interaction ( $F =$   
 8 0.345,  $\omega^2 < 0.001$ ,  $p = 0.557$ ). Peak discharge rates did not change over time in the control  
 9 condition (md = -0.14 (-0.36, 0.07) pps,  $d = -0.14$  (-0.31, 0.03),  $p = 0.084$ ) but increased after  
 10 the handgrip condition (md = 0.36 (0.11, 0.60) pps,  $d = 0.36$  (0.16, 0.56),  $p = 0.002$ ),  
 11 irrespective of age.

12

13 *Recruitment thresholds*

14 For *soleus*, there was no time by condition by age interaction ( $F = 1.81$ ,  $\omega^2 < 0.001$ ,  $p =$   
 15 0.180) nor time by condition interaction ( $F = 1.33$ ,  $\omega^2 < 0.001$ ,  $p = 0.250$ ). Recruitment  
 16 threshold remained unchanged before and in both the control (md = 0.06 (-0.60, 0.71) % of  
 17 peak torque,  $d = 0.03$  (-0.28, 0.28),  $p = 0.826$ ) and handgrip (md = -0.44 (-1.2, 0.32) % of  
 18 peak torque,  $d = -0.18$  (-0.45, 0.09),  $p = 0.179$ ) conditions, irrespective of age. For *tibialis*  
 19 *anterior*, there was a time by condition by age interaction ( $F = 4.79$ ,  $\omega^2 < 0.001$ ,  $p = 0.029$ ).  
 20 Recruitment threshold increased after handgrip in older [ $d = 0.84$  (0.55, 1.13),  $p < 0.001$ ] but  
 21 not for young adults [ $d = -0.26$  (-0.53, 0.01),  $p = 0.527$ ], and remained unchanged before and  
 22 after control for both older ( $p = 0.319$ ) and young adults ( $p = 0.235$ ).

23 Table 1. Estimated marginal means and mean differences (95% confidence interval lower and  
 24 upper limits) for  $\Delta F$ , peak discharge rates, and recruitment thresholds before and after control  
 25 or handgrip conditions in young and older adults and for *soleus* and *tibialis anterior*.

| Variables                    | $\Delta F$ (pps)  | Peak discharge rates (pps) | Recruitment threshold (% of peak torque) |
|------------------------------|-------------------|----------------------------|------------------------------------------|
| <b>Older adults - Soleus</b> |                   |                            |                                          |
| Before control               | 1.81 (1.44, 2.17) | 8.75 (8.17, 9.32)          | 8.11 (6.92, 9.30)                        |
| After control                | 1.73 (1.36, 2.09) | 8.62 (8.05, 9.20)          | 8.39 (7.20, 9.57)                        |



|                                                |                     |                      |                      |
|------------------------------------------------|---------------------|----------------------|----------------------|
| After – before control                         | -0.08 (-0.37, 0.21) | -0.13 (-0.39, 0.14)  | 0.28 (-0.76, 1.31)   |
| Before handgrip                                | 2.02 (1.66, 2.39)   | 8.54 (7.96, 9.12)    | 8.66 (7.47, 9.85)    |
| After handgrip                                 | 2.41 (2.04, 2.77)   | 9.00 (8.42, 9.57)    | 9.01 (7.82, 10.20)   |
| After – before handgrip                        | 0.39 (0.10, 0.67)   | 0.46 (0.20, 0.72)    | 0.35 (-0.68, 1.38)   |
| <hr/>                                          |                     |                      |                      |
| <b>Young adults - <i>Soleus</i></b>            |                     |                      |                      |
| Before control                                 | 2.64 (2.21, 3.08)   | 10.65 (9.95, 11.36)  | 9.20 (7.79, 10.61)   |
| After control                                  | 2.53 (2.09, 2.96)   | 10.75 (10.04, 11.45) | 9.03 (7.62, 10.45)   |
| After – before control                         | -0.12 (-0.44, 0.20) | 0.10 (-0.19, 0.39)   | -0.17 (-1.31, 0.98)  |
| Before handgrip                                | 2.60 (2.15, 3.06)   | 10.57 (9.85, 11.28)  | 9.54 (8.06, 11.02)   |
| After handgrip                                 | 2.96 (2.51, 3.41)   | 10.91 (10.20, 11.63) | 8.42 (6.94, 9.90)    |
| After – before handgrip                        | 0.35 (-0.04, 0.74)  | 0.34 (-0.01, 0.70)   | -1.12 (-2.51, 0.28)  |
| <hr/>                                          |                     |                      |                      |
| <b>Older adults – <i>Tibialis anterior</i></b> |                     |                      |                      |
| Before control                                 | 2.92 (2.44, 3.40)   | 12.14 (11.09, 13.19) | 10.39 (8.94, 11.84)  |
| After control                                  | 2.79 (2.31, 3.26)   | 11.89 (10.84, 12.95) | 10.88 (9.43, 12.33)  |
| After – before control                         | -0.13 (-0.39, 0.13) | -0.25 (-0.60, 0.10)  | 0.49 (-0.17, 1.15)   |
| Before handgrip                                | 2.95 (2.47, 3.44)   | 12.04 (10.98, 13.10) | 9.71 (8.24, 11.18)   |
| After handgrip                                 | 3.36 (2.88, 3.85)   | 12.22 (11.16, 13.28) | 11.36 (9.88, 12.83)  |
| After - before handgrip                        | 0.41 (0.10, 0.72)   | 0.18 (-0.23, 0.59)   | 1.65 (0.80, 2.49)    |
| <hr/>                                          |                     |                      |                      |
| <b>Young adults - <i>Tibialis anterior</i></b> |                     |                      |                      |
| Before control                                 | 4.18 (3.71, 4.66)   | 14.75 (13.71, 15.79) | 11.36 (9.91, 12.80)  |
| After control                                  | 4.21 (3.74, 4.69)   | 14.71 (13.67, 15.75) | 10.79 (9.34, 12.23)  |
| After – before control                         | 0.03 (-0.25, 0.30)  | -0.04 (-0.41, 0.33)  | -0.57 (-1.29, 0.15)  |
| Before handgrip                                | 4.18 (3.70, 4.66)   | 14.12 (13.08, 15.17) | 11.56 (10.10, 13.02) |
| After handgrip                                 | 4.59 (4.10, 5.07)   | 14.66 (13.62, 15.75) | 11.05 (9.59, 12.51)  |
| After – before handgrip                        | 0.41 (0.10, 0.71)   | 0.53 (0.12, 0.94)    | -0.51 (-1.31, 0.29)  |

1

## 2 Experiment 2

3 In summary,  $\Delta F$  decreased in motor units of both young and older adults when vibration was  
4 applied to the antagonist tendon. In *soleus*, these reductions were similar for young and older  
5 adults but in *tibialis anterior* the magnitude of reduction was smaller for older than young  
6 adults. Peak discharge rates remained unchanged in *soleus* but reduced for *tibialis anterior*,  
7 irrespective of age. Recruitment threshold remained unchanged in *soleus*, irrespective of age,

1 but increased for young adults only in *tibialis anterior*. Descriptive statistics for each group,  
2 condition, and muscle are presented in Table 2.

3

#### 4 *Estimates of PICs ( $\Delta F$ )*

5 For *soleus*, a condition effect on  $\Delta F$  ( $F = 11.16$ ,  $\omega^2 = 0.12$ ,  $p = 0.001$ ), but not a condition by  
6 age interaction ( $F = 0.80$ ,  $\omega^2 < 0.001$ ,  $p = 0.374$ ), was detected.  $\Delta F$  was lower in the vibration  
7 than the control condition, irrespective of age group [ $md = 0.28$  (0.11, 0.45) pps,  $d = 0.54$   
8 (0.19, 0.89)]. For *tibialis anterior*, there was a condition by age interaction on  $\Delta F$  ( $F = 4.66$ ,  
9  $\omega^2 = 0.01$ ,  $p = 0.032$ ).  $\Delta F$  reductions in older adults [ $md = 0.42$  (0.17, 0.67) pps,  $d = 0.51$   
10 (0.26, 0.76)] were smaller than in young adults [ $md = 0.72$  (0.47, 0.97) pps,  $d = 0.87$  (0.62,  
11 1.11)]. A pair of outlier motor units was identified in the *tibialis anterior* analysis but  
12 excluding them from the model did not remove the evidence of condition by age interaction  
13 ( $F = 3.68$ ,  $\omega^2 = 0.01$ ,  $p = 0.056$ ).

14

#### 15 *Peak discharge rates and recruitment threshold*

16 For *soleus*, a condition effect on peak discharge rates ( $F = 9.98$ ,  $\omega^2 = 0.10$ ,  $p = 0.002$ ), but not  
17 a condition by age interaction ( $F = 0.41$ ,  $\omega^2 < 0.001$ ,  $p = 0.526$ ), was detected. Peak discharge  
18 rates were 0.20 (0.07, 0.32) pps lower in the vibration than the control condition [ $d = 0.51$   
19 (0.17, 0.86)], irrespective of age. There was no condition effect ( $F = 0.10$ ,  $\omega^2 = 0.01$ ,  $p =$   
20 0.752) nor a condition by age interaction on recruitment threshold ( $F = 0.95$ ,  $\omega^2 < 0.001$ ,  $p =$   
21 0.333). For *tibialis anterior*, a condition effect on peak discharge rates ( $F = 86.22$ ,  $\omega^2 = 0.23$ ,  
22  $p < 0.001$ ), but not a condition by age interaction ( $F = 0.34$ ,  $\omega^2 < 0.001$ ,  $p = 0.559$ ), was  
23 detected. Peak discharge rates were 0.64 (0.50, 0.78) pps lower in the vibration than control  
24 condition ( $d = 0.77$  (0.59, 0.95)) irrespective of age. There was a condition by age interaction  
25 on recruitment threshold ( $F = 11.61$ ,  $\omega^2 = 0.04$ ,  $p < 0.001$ ). Recruitment threshold remained  
26 unchanged in older adults ( $d = -0.06$  (-0.31, 0.18),  $p = 0.585$ ) but increased in young adults ( $d$   
27 = 0.50 (0.26, 0.74),  $p < 0.001$ ).

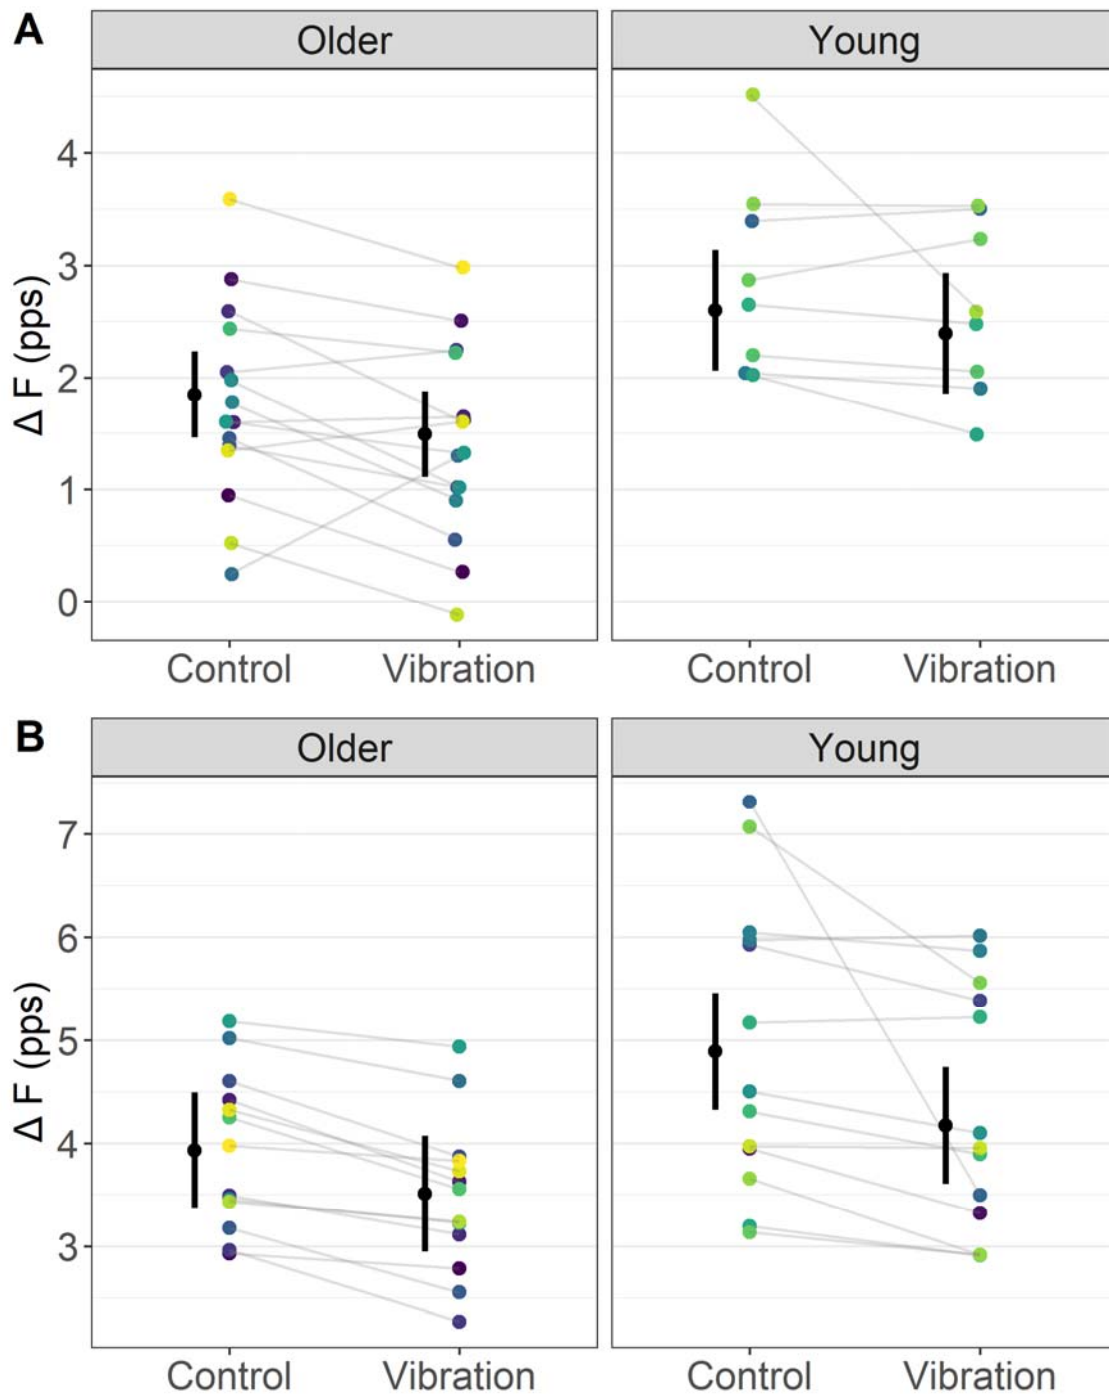

1

2 Figure 5. *Soleus* (Panel A) and *tibialis anterior* (Panel B)  $\Delta F$  outcomes in control and  
3 vibration conditions for older and young adults. Note that, for *soleus*,  $\Delta F$  was reduced during  
4 the vibration compared to the control condition, similarly between older and young adults.  
5 For *tibialis anterior*,  $\Delta F$  was reduced in older adults during the vibration condition, but to a  
6 smaller magnitude than young adults (i.e., condition by age interaction). The mean (black

1 circle) and 95% confidence interval are offset to the left. Individual data points (average  $\Delta F$   
 2 per participant) are coloured by participants. pps = peaks per second.

3 Table 2. Estimated marginal means and mean differences (95% confidence interval lower and  
 4 upper limits) for  $\Delta F$ , peak discharge rates, and recruitment thresholds for vibration and  
 5 control conditions.

| Variables                                      | $\Delta F$ (pps)     | Peak discharge rates (pps) | Recruitment threshold (% of peak torque) |
|------------------------------------------------|----------------------|----------------------------|------------------------------------------|
| <b>Older adults - <i>Soleus</i></b>            |                      |                            |                                          |
| Control                                        | 1.85 (1.46, 2.23)    | 9.09 (8.20, 9.98)          | 12.15 (9.59, 14.33)                      |
| Vibration                                      | 1.49 (1.11, 1.88)    | 8.93 (8.04, 9.82)          | 12.37 (10.18, 14.55)                     |
| Vibration – Control                            | -0.36 (-0.65, -0.06) | -0.16 (-0.38, 0.06)        | 0.22 (-1.41, 0.35)                       |
| <b>Young adults – <i>Soleus</i></b>            |                      |                            |                                          |
| Control                                        | 2.60 (2.06, 2.23)    | 10.63 (9.40, 11.85)        | 15.01 (12.01, 18.00)                     |
| Vibration                                      | 2.39 (1.86, 2.93)    | 10.39 (9.17, 11.61)        | 14.58 (11.58, 17.57)                     |
| Vibration – Control                            | -0.21 (-0.53, 0.12)  | -0.24 (-0.48, 0.01)        | -0.43 (-1.73, 0.87)                      |
| <b>Older adults - <i>Tibialis anterior</i></b> |                      |                            |                                          |
| Control                                        | 3.93 (3.37, 4.49)    | 13.15 (12.26, 14.05)       | 11.62 (9.84, 13.40)                      |
| Vibration                                      | 3.51 (2.95, 4.07)    | 12.47 (11.58, 13.37)       | 11.47 (9.69, 13.25)                      |
| Vibration – Control                            | -0.42 (-0.67, -0.17) | -0.72 (-0.97, -0.47)       | -0.15 (-0.88, 0.57)                      |
| <b>Young adults - <i>Tibialis anterior</i></b> |                      |                            |                                          |
| Control                                        | 4.89 (4.32, 5.46)    | 14.50 (13.60, 15.40)       | 14.14 (12.34, 15.95)                     |
| Vibration                                      | 4.17 (3.61, 4.74)    | 13.90 (13.00, 14.80)       | 15.33 (13.53, 17.14)                     |
| Vibration – Control                            | -0.87 (-1.11, -0.62) | -0.60 (-0.85, -0.35)       | -1.19 (-1.90, -0.47)                     |

6

7

## 8 **Motor unit identification**

9 In Experiment 1, 201 *soleus* motor units for 21 older adults and 110 *soleus* motor  
 10 units for 14 older adults were identified by the decomposition algorithm that could be  
 11 matched before and after the control condition, resulting in 78 and 64 test units, respectively.  
 12 187 *soleus* motor units were matched before and after the handgrip contraction for 19 older

1 adults and 101 for 12 young adults, resulting in 79 and 43 test units, respectively. 326 *tibialis*  
2 *anterior* motor units for 16 older adults and 262 for 15 young adults were matched before and  
3 after the control condition, resulting in 154 and 132 test units, respectively. 253 *tibialis*  
4 *anterior* motor units for 14 older adults and 222 for 13 young adults were matched before and  
5 after the control condition, resulting in 110 and 116 test units, respectively. In Experiment 2,  
6 97 *soleus* motor units for 15 older adults and 60 motor units for 8 young adults were matched  
7 between control and vibration conditions, resulting in 42 and 35 test units respectively. For,  
8 246 *tibialis anterior* motor units for 13 older adults and 215 motor units from 13 young  
9 adults were matched between control and vibration conditions, resulting in 143 and 147 test  
10 units, respectively. Motor units sample median and interquartile range per experiment, group,  
11 and conditions are presented in Supplementary material 2.

12

## 13 DISCUSSION

14 This study tested the ability of older and young adults to both amplify and inhibit  
15 motoneuronal PICs, estimated using paired motor unit analyses (i.e.,  $\Delta F$ ), in response to a  
16 remote handgrip contraction and to reciprocal inhibition, respectively. We previously showed  
17 that  $\Delta F$  was lower in older than young adults, measured in the same cohort of subjects  
18 (Orssatto *et al.*, 2021a). However, here we present the first evidence that the abilities of  
19 older adults to modulate PICs in response to a remote handgrip contraction, which  
20 theoretically increases monoaminergic projections onto the motor neurones, is preserved in  
21 both *soleus* and *tibialis anterior*. These results are not consistent with our hypothesis that  
22 older adults would have a reduced ability to increase  $\Delta F$  after a remote handgrip contraction.  
23 However, we also observed that older adults' abilities to inhibit  $\Delta F$  was preserved in *soleus*  
24 but not *tibialis anterior*, in which they presented attenuated inhibition. These data partially  
25 agree with our initial hypothesis that inhibition would be impaired in older adults but clarify  
26 that the effect may not be consistent between muscles or muscle groups, which we discuss  
27 further below. The novel findings from this study are fundamental to our understanding of  
28 facilitatory-inhibitory control of PICs in older and young adults.

29

### 30 **Experiment 1 – Estimates of PIC neuromodulation**

31 Increases in  $\Delta F$  following the 30-s remote handgrip contraction (at 40% of maximal  
32 force) for both *soleus* (16%) and *tibialis anterior* (11.4%) were consistent with our initial  
33 hypothesis. This amplification likely results from the increased available serotonin delivered

1 by descending tracts within the spinal cord, which has diffuse input onto motor neurones  
2 across diverse muscle groups (Heckman *et al.*, 2008; Wei *et al.*, 2014). This should be  
3 predominately attributed to the activity of serotonergic projections to the spinal cord, which is  
4 increased along with motor output (Jacobs *et al.*, 2002), than noradrenaline, which is more  
5 influenced by arousal state (Aston-Jones *et al.*, 2001). Therefore, the increased availability of  
6 serotonin along with its highly diffuse descending projections into the spinal cord is expected  
7 to be the main mechanism underpinning the observed PIC amplification.

8         Contrary to expectation, young and older adults showed similar PIC amplification  
9 after the sustained handgrip contraction in both *soleus* and *tibialis anterior*. One  
10 consideration is that this similarity might be limited to relatively light submaximal  
11 contractions, such as the ramp contractions in our study which peaked at 20% of maximum  
12 torque capacity. The choice of this torque level was largely based on matching the forces that  
13 may be exerted during walking or postural sway, and partly based on ensuring optimal motor  
14 unit identification (fewer motor unit pairs are detected at higher contraction levels and fatigue  
15 is generated by prolonged and high intensity contractions, making the technique less feasible  
16 as contraction level increases). However, the magnitude of PIC amplification depends  
17 critically on the level of monoaminergic drive onto the motor neurones (Hounsgaard *et al.*,  
18 1988; Lee & Heckman, 1999, 2000), which in turn is affected by the exerted contraction  
19 intensity (Jacobs *et al.*, 2002). Thus, stronger contractions demand greater release of  
20 monoamines onto the motor neurones and should enable greater PIC amplification  
21 (Hounsgaard *et al.*, 1988; Lee & Heckman, 1999, 2000; Orssatto *et al.*, 2021*b*). Using  
22 contractions to 20% of maximum will have prompted only a moderate increase in serotonin  
23 concentration, and potentially below some existing ceiling, allowing the observed PIC  
24 amplification in the older group to occur subsequent to the handgrip contraction. We cannot  
25 rule out the possibility that higher intensity contractions, providing stronger monoaminergic  
26 input to amplify PICs, would have reduced the capacity for the handgrip contraction itself to  
27 provide monoaminergic drive above that already provided by the contraction itself, in either  
28 the older or young adults. Nonetheless, a recent study by our group (including a subset of  
29 older adults from the present study) showed that non-strength-trained older adults were  
30 unable to further amplify *soleus* PICs as plantar flexion contraction intensity increased from  
31 20 to 40% of peak torque (Orssatto *et al.*, 2022*b*). This is not consistent with the behaviour of  
32 increased PICs amplification observed in young adults when contraction intensity increased  
33 from 10 to 30% of peak torque (Orssatto *et al.*, 2021*b*), indicating an age-dependent  
34 difference in the capacity to increase PIC strength with contraction intensity. These results

1 are suggestive of a potentially impaired serotonergic input onto the motor neurones that may  
2 manifest at higher contraction intensities in older individuals only. Although  $\Delta F$  values are  
3 more difficult to attain in higher-force contractions, it would be of interest to test PIC  
4 amplification at higher force levels in future experiments.

5

## 6 **Experiment 2 – Estimates of PIC inhibition**

7 We tested the hypothesis that  $\Delta F$  should decrease during reciprocal inhibition,  
8 induced by antagonist tendon vibration, in *soleus* and *tibialis anterior*. Our data demonstrate  
9 that high-frequency vibration of *tibialis anterior* and the Achilles tendon successfully  
10 induced reciprocal inhibition, reducing  $\Delta F$  in *soleus* by 0.28 pps (12.6%) in both older and  
11 young adults, and in *tibialis anterior* by 0.42 pps (10.7%) in older adults and 0.87 pps  
12 (17.8%) in young adults. High-frequency tendon vibration triggers excitatory drive from Ia  
13 afferents via stimulation of muscle spindles, which consequently generates reciprocal  
14 inhibition by activating the Ia inhibitory inter-neurons (Burke *et al.*, 1976). The reductions  
15 in  $\Delta F$  during the reciprocal inhibition condition shown in our data are consistent with findings  
16 from animal experiments showing reciprocal inhibition-evoked PIC reductions induced by *in-*  
17 *vivo* voltage-clamp techniques in cats (Kuo *et al.*, 2003; Hyngstrom *et al.*, 2007). However,  
18 using such techniques, dendritic PICs were reduced by ~50% in the ankle extensors by  
19 imposition of small joint rotations (Hyngstrom *et al.*, 2007) and by ~69% during tonic nerve  
20 electrical stimulation to antagonist muscles (in a standard monoaminergic state) (Kuo *et al.*,  
21 2003). Both of these animal experiments therefore showed a much greater reduction than we  
22 observed in the current experiment. Nonetheless, our results are consistent with recent human  
23 experiments showing comparable  $\Delta F$  reductions of  $0.54 \pm 0.09$  pps in both *tibialis anterior*  
24 (effect size  $g = 0.49$ ) and *soleus* ( $g = 0.26$ ) using a similar protocol of antagonist tendon  
25 vibration (Pearcey *et al.*, 2022). We also recently observed similar  $\Delta F$  reductions of 0.33 pps  
26 (9.8%) in *gastrocnemius medialis* of young adults after reciprocal inhibition was induced by  
27 electrical stimulation of the common peroneal nerve (Mesquita *et al.*, 2022). In addition,  
28 decreasing the level of reciprocal inhibition (applying stimulations to the common peroneal  
29 nerve, below motor unit threshold) increased  $\Delta F$  in *soleus* (Vandenberk & Kalmar, 2014),  
30 and artificially activating an inhibitory reflex by sural nerve stimulation reduced the initial  
31 steep increases in discharge rates in *tibialis anterior* motor neurones during ramped  
32 contractions, which is likely modulated by PICs (Revill & Fuglevand, 2017). These data  
33 suggest that the magnitude of reciprocal inhibition on PICs may be smaller when assessed by



1 the  $\Delta F$  method in humans than in direct measurements in animal experiments. This could  
2 result from the stronger reciprocal inhibition evoked in animal experiments (Kuo *et al.*, 2003;  
3 Hyngstrom *et al.*, 2007) and/or because  $\Delta F$  only estimates the portion of PICs above the  
4 discharging threshold (Gorassini *et al.*, 2002).

5 We hypothesised that older adults would present smaller  $\Delta F$  reductions than young  
6 adults because reciprocal inhibition is generally considered to be reduced with ageing in both  
7 *soleus* and *tibialis anterior* (Kido *et al.*, 2004). However, our data show a difference only in  
8 *tibialis anterior*. The weaker inhibition of *tibialis anterior* in the older adults might be  
9 explained by (i) an age-related alteration in reciprocal inhibition due to a decrease in muscle  
10 spindle quantity or changes in their structure, innervation, and sensitivity (Henry & Baudry,  
11 2019), (ii) by reductions in the total number of nerve fibres, including spindle afferents  
12 (Swallow, 1966), and deterioration of Ia afferent pathways (observed in aged rats) (Vaughan  
13 *et al.*, 2017), (iii) by changes in the transmission efficacy at the Ia inhibitory inter neurone, or  
14 (iv) by efferent fibre impairment (Geertsen *et al.*, 2017). Although there is a lack of  
15 consensus in the literature, reduced transmission efficacy of Ia afferents with ageing  
16 (measured indirectly with h-reflex responses) (Scaglioni *et al.*, 2003, 2012; Klass *et al.*, 2011;  
17 Škarabot *et al.*, 2019, 2020) could contribute to an impaired reciprocal inhibition of motor  
18 neuronal PICs. As a consequence, this could partly underpin the increased *tibialis anterior*  
19 coactivation during important daily tasks such as single leg stance (Kurz *et al.*, 2018) and  
20 during gait (Hortobágyi *et al.*, 2009) in older adults, which should be explored in future  
21 studies.

22 The dissimilar response between *soleus* and *tibialis anterior* may speculatively be  
23 explained by distinct, between-muscle effects of ageing on muscle spindles and sensory  
24 afferents. Although no direct comparison between *soleus* and *tibialis anterior* exists,  
25 reductions in muscle spindle diameter have been observed in aged *deltoid* and *extensor*  
26 *digitorum*, although not in *quadriceps* or *biceps brachii*, and decreases in the number of  
27 intrafusal fibres in *deltoid* have also been detected (Kararizou *et al.*, 2005). It is therefore  
28 possible that ageing differently affects *soleus* and *tibialis anterior* muscle spindles and  
29 sensory afferents, and this might be confirmed in future experiments. Interestingly, passive  
30 ankle plantar and dorsiflexion did detectably influenced cortico-spinal responses in *tibialis*  
31 *anterior* in young adults but not in older adults, while it remained unchanged in *soleus* in  
32 both groups (Škarabot *et al.*, 2020). These data support the assertion that *soleus* and *tibialis*  
33 *anterior* afferent and/or efferent pathways might be differently affected by ageing. Also, age-



1 related decreases in vibration–electromyogram coherence, response gain, response amplitude,  
2 and scaling of the *soleus* response to Achilles tendon stimuli have been shown (Mildren *et*  
3 *al.*, 2020), indicating impaired proprioceptive feedback from *soleus*. The different functional  
4 roles of *soleus* and *tibialis anterior* in daily tasks should also be considered when interpreting  
5 the present data. Both muscles are active during daily living activities, such as upright  
6 standing and locomotor propulsion (e.g., gait) (Soames & Atha, 1981; Masani *et al.*, 2013),  
7 however *soleus* serves an anti-gravity role, implying that motor units are active for longer and  
8 produce greater cumulative force than flexor muscles during daily living activities.  
9 Additional data supporting this claim includes evidence that peak discharging rates are  
10 maintained with ageing in well-used muscles (e.g., hand muscles, *quadriceps*, and *triceps*  
11 *surae*) but decline markedly in lesser used muscles (e.g., *hamstrings* and *tibialis anterior*)  
12 (Orssatto *et al.*, 2022a). In fact, studies show that disuse can aggravate the deleterious effects  
13 of ageing on the nervous system, while trained older adults show a substantial preservation of  
14 neural function (Aagaard *et al.*, 2010; McGregor *et al.*, 2011; Unhjem *et al.*, 2016; Hvid *et al.*,  
15 2018; Orssatto *et al.*, 2020). Regardless, direct comparisons between *soleus* and *tibialis*  
16 *anterior* are required to elucidate the mechanisms underpinning the dissimilar effects of  
17 ageing on PIC inhibitory control between *soleus* and *tibialis anterior*.

18  
19

## 20 **Strengths, limitations and delimitations**

21 Our study employed a validated and extensively used method of PIC strength  
22 estimation in humans (Udina *et al.*, 2010; Hassan *et al.*, 2019, 2021; Trajano *et al.*, 2020;  
23 Orssatto *et al.*, 2021b, 2021a; Mesquita *et al.*, 2022) that shows very good repeated-measures  
24 reliability, as demonstrated by the high reliability of measurements in the control condition of  
25 Experiment 1. However, our findings should not be extrapolated to contraction intensities and  
26 motor units with recruitment threshold higher than those used in our study (20% and 30% of  
27 peak torques), as discussed previously. Also, our findings relate only to *soleus* and *tibialis*  
28 *anterior* as, for example, different muscles have distinct muscle spindle concentrations  
29 (Banks, 2006), which may alter the strength of reciprocal inhibition and the effects of ageing.  
30 Daily activities require the activation of different muscle groups; thus, future investigations  
31 of the effects of aging on neuromodulatory-inhibitory control of PICs in other muscles, and  
32 its influence on possible impairments in physical function, require additional study. Lastly,  
33 we have included only non-sarcopaenic older adults, so our results should not be extrapolated  
34 to populations with different physical characteristics or potential health conditions, such as

1 the very old (> 85 years old), sarcopenic, or frail, or those with neurological disorders or  
2 individuals with physical activity levels.

3

4

## 5 **Conclusions**

6 We present novel data demonstrating the control of motor neuronal PIC facilitation and  
7 inhibition in older adults by estimating PIC strengths using the paired-motor unit technique.  
8 We show that older adults have a preserved ability to amplify PICs through remote muscle  
9 contraction (e.g., handgrip, as used presently), which would diffusely increase serotonergic  
10 input onto motor neurones in both *soleus* and *tibialis anterior*. Subsequently, we present  
11 evidence of age-related reciprocal inhibition-induced impairment of PIC deactivation in  
12 *tibialis anterior*, which, conversely, was preserved with ageing in *soleus*. These findings  
13 relate to tests completed in mostly lower-threshold motor units during low intensity  
14 contractions (up to 20 or 30% of the individuals' maximal capacity) and should not be  
15 extrapolated to higher threshold motor units or higher intensity contractions. The logical next  
16 steps are to explore (1) facilitation-inhibition control of PICs in higher intensity contractions  
17 and in different muscles, (2) the variable control of PICs on motor performance, and (3)  
18 responses to exercise interventions in older adults and other clinical populations.

19

## 20 **ACKNOWLEDGEMENTS**

21 The writing period of the present manuscript was funded by the Faculty Write-up Scholarship  
22 provided by Queensland University of Technology. The authors thank Dr Raphael L.  
23 Sakugawa for developing a MATLAB script that facilitated calculation of  $\Delta F$ , peak discharge  
24 rates, and recruitment thresholds.

25

26

1   Supplementary Material 1.

2   In *soleus*, no condition by age interaction ( $F = 0.01$ ,  $p = 0.960$ ) or age effect ( $F = 0.16$ ,  $p =$   
3   0.685) on  $\Delta F$  mean differences was found. However, there was a condition effect ( $F = 28.65$ ,  
4    $p < 0.001$ ) in which handgrip mean differences [0.370 (0.237, 0.503) pps] were higher than in  
5   control [-0.098 (0.237, 0.503) pps]. For *tibialis anterior*, no condition by age interaction ( $F =$   
6   1.35,  $p = 0.247$ ) or age effect ( $F = 0.96$ ,  $p = 0.336$ ) on  $\Delta F$  mean differences was found.  
7   However, there was a condition effect ( $F = 29.74$ ,  $p < 0.001$ ) in which handgrip mean  
8   differences [0.404 (0.251, 0.556) pps] were higher than in control [-0.06 (-0.196, 0.081) pps].  
9   These findings agree with the output of the 3-way linear mixed models presented within the  
10  main manuscript, confirming the lack of age effect in the condition by time interaction for  
11  both *soleus* and *tibialis anterior*.

12

13

- 1 Supplementary Material 2. Total and test motor unit sample medians (interquartile range) for
- 2 each group and condition used in Experiments 1 and 2.

---

**Experiment 1**

---

| Group                                              | Older adults  |             | Young adults |             |
|----------------------------------------------------|---------------|-------------|--------------|-------------|
| Condition                                          | Control       | Handgrip    | Control      | Handgrip    |
| <i>Soleus</i> motor units                          | 8 (7, 10)     | 8 (6, 11)   | 7 (5, 9)     | 7.5 (7, 9)  |
| <i>Soleus</i> test units ( $\Delta F$ )            | 3 (2, 4)      | 2 (2, 7)    | 5 (3, 5)     | 3 (2, 4)    |
| <i>Tibialis anterior</i> motor units               | 20.5 (16, 26) | 17 (14, 23) | 17 (13, 23)  | 17 (14, 22) |
| <i>Tibialis anterior</i> test units ( $\Delta F$ ) | 10 (7, 14)    | 10 (6, 10)  | 8 (5, 13)    | 8 (5, 13)   |

---

**Experiment 2**

| Group                                              | Older adults | Young adults |
|----------------------------------------------------|--------------|--------------|
| <i>Soleus</i> motor units                          | 6 (5, 7)     | 5 (4, 8)     |
| <i>Soleus</i> test units ( $\Delta F$ )            | 3 (1, 4)     | 2 (1, 5)     |
| <i>Tibialis anterior</i> motor units               | 19 (15, 26)  | 18 (11, 20)  |
| <i>Tibialis anterior</i> test units ( $\Delta F$ ) | 11 (7, 14)   | 14 (5, 17)   |

---

- 3 Note: The presented numbers represent the quantity of motor units tracked over time (before
- 4 and after each condition) in Experiment 1 and tracked between conditions (vibration and
- 5 control) in Experiment 2.

6  
7

1 REFERENCES

- 2 Aagaard P, Suetta C, Caserotti P, Magnusson SP & Kjær M (2010). Role of the nervous  
3 system in sarcopenia and muscle atrophy with aging: Strength training as a  
4 countermeasure. *Scand J Med Sci Sport* **20**, 49–64.
- 5 Aston-Jones G, Chen S, Zhu Y & Oshinsky ML (2001). A neural circuit for circadian  
6 regulation of arousal. *Nat Neurosci* **4**, 732–738.
- 7 Banks RW (2006). An allometric analysis of the number of muscle spindles in mammalian  
8 skeletal muscles. *J Anat* **208**, 753–768.
- 9 Burke D, Hagbarth K-E, Lofstedt L, Gunnar Wallin B, Martin CJ & Burke D (1976). The  
10 responses of human muscle spindle endings to vibration of non-contracting muscles.  
11 **261**, 673–693.
- 12 Frančič A & Holobar A (2021). On the Reuse of Motor Unit Filters in High Density Surface  
13 Electromyograms with Different Signal-to-Noise Ratios. In *Proc. of T. Jarm et al.*  
14 *(Eds.): EMBECE 2020*, pp. 1–9. IFMBE Proceedings.
- 15 Frančič A & Holobar A (2022). Motor Unit Tracking Across Low Contraction Levels of  
16 Biceps Brachii Muscle. In *Converging Clinical and Engineering Research on*  
17 *Neurorehabilitation IV*, ed. Torricelli D, Metin A & Pons JL, pp. 401–405. Springer.  
18 Available at:  
19 <https://www.springer.com/us/book/9783319466682>  
20 [http://link.springer.com/10.1007/978-3-319-46669-9](https://link.springer.com/10.1007/978-3-319-46669-9).
- 21 Geertsen SS, Willerslev-Olsen M, Lorentzen J & Nielsen JB (2017). Development and aging  
22 of human spinal cord circuitries. *J Neurophysiol* **118**, 1133–1140.
- 23 Gorassini M, Yang JF, Siu M & Bennett DJ (2002). Intrinsic activation of human  
24 motoneurons: Possible contribution to motor unit excitation. *J Neurophysiol* **87**, 1850–  
25 1858.
- 26 Grande G & Cafarelli E (2003). Ia afferent input alters the recruitment thresholds and firing  
27 rates of single human motor units. *Exp Brain Res* **150**, 449–457.
- 28 Hassan AS, Fajardo ME, Cummings M, McPherson LM, Negro F, Dewald JPA, Heckman CJ  
29 & Pearcey GE (2021). Estimates of persistent inward currents are reduced in upper limb  
30 motor units of older adults. *J Physiol*; DOI: 10.1113/jp282063.
- 31 Hassan AS, Kim EH, Khurram OU, Cummings M, Thompson CK, Miller McPherson L,  
32 Heckman CJ, Dewald JPA & Negro F (2019). Properties of Motor Units of Elbow and  
33 Ankle Muscles Decomposed Using High-Density Surface EMG. *Proc Annu Int Conf*  
34 *IEEE Eng Med Biol Soc EMBS3874–3878*.

- 1 Hassan AS, Thompson CK, Negro F, Cummings MQ, Powers RK, Heckman CJ, Dewald J &  
2 McPherson LM (2020). Impact of parameter selection on estimates of motoneuron  
3 excitability using paired motor unit analysis. *J Neural Eng*; DOI: 10.1088/1741-  
4 2552/ab5eda.
- 5 Heckman CJ, Gorassini MA & Bennett DJ (2005). Persistent inward currents in motoneuron  
6 dendrites: Implications for motor output. *Muscle and Nerve* **31**, 135–156.
- 7 Heckman CJ, Hyngstrom AS & Johnson MD (2008). Active properties of motoneurone  
8 dendrites: Diffuse descending neuromodulation, focused local inhibition. *J Physiol* **586**,  
9 1225–1231.
- 10 Henry M & Baudry S (2019). Age-related changes in leg proprioception: Implications for  
11 postural control. *J Neurophysiol* **122**, 525–538.
- 12 Holobar A, Minetto MA & Farina D (2014). Accurate identification of motor unit discharge  
13 patterns from high-density surface EMG and validation with a novel signal-based  
14 performance metric. *J Neural Eng*; DOI: 10.1088/1741-2560/11/1/016008.
- 15 Holobar A & Zazula D (2007). Multichannel blind source separation using convolution  
16 Kernel compensation. *IEEE Trans Signal Process* **55**, 4487–4496.
- 17 Hortobágyi T & Devita P (2006). Mechanisms Responsible for the Age-Associated Increase  
18 in Coactivation of Antagonist Muscles. *Exerc Sport Sci Rev* 29–35.
- 19 Hortobágyi T, Del Olmo MF & Rothwell JC (2006). Age reduces cortical reciprocal  
20 inhibition in humans. *Exp Brain Res* **171**, 322–329.
- 21 Hortobágyi T, Solnik S, Gruber A, Rider P, Steinweg K, Helseth J & DeVita P (2009).  
22 Interaction between age and gait velocity in the amplitude and timing of antagonist  
23 muscle coactivation. *Gait Posture* **29**, 558–564.
- 24 Hounsgaard J, Hultborn H, Jespersen B & Kiehn O (1988). Bistability of  
25 alpha $\square$  motoneurons in the decerebrate cat and in the acute spinal cat after intravenous  
26 5 $\square$ hydroxytryptophan. *J Physiol* **405**, 345–367.
- 27 Hultborn H, Denton ME, Wienecke J & Nielsen JB (2003). Variable amplification of synaptic  
28 input to cat spinal motoneurons by dendritic persistent inward current. *J Physiol* **552**,  
29 945–952.
- 30 Hvid LG, Aagaard P, Ørtenblad N, Kjaer M & Suetta C (2018). Plasticity in central neural  
31 drive with short-term disuse and recovery - effects on muscle strength and influence of  
32 aging. *Exp Gerontol* **106**, 145–153.
- 33 Hyngstrom AS, Johnson MD, Miller JF & Heckman CJ (2007). Intrinsic electrical properties  
34 of spinal motoneurons vary with joint angle. *Nat Neurosci* **10**, 363–369.

- 1 Jacobs BL, Martín-Cora FJ & Fornal CA (2002). Activity of medullary serotonergic neurons  
2 in freely moving animals. *Brain Res Rev* **40**, 45–52.
- 3 Johnson H, Ulfhake B, Dagerlind Å, Bennett GW, Fone KCF & Hökfelt T (1993). The  
4 serotonergic bulbospinal system and brainstem–spinal cord content of serotonin,  $\alpha$ -  
5 TRH, and substance P-like immunoreactivity in the aged rat with special reference to  
6 the spinal cord motor nucleus. *Synapse* **15**, 63–89.
- 7 Kararizou E, Manta P, Kalfakis N & Vassilopoulos D (2005). Morphometric study of the  
8 human muscle spindle. *Anal Quant Cytol Histol* **27**, 1–4.
- 9 Kido A, Tanaka N & Stein RB (2004). Spinal excitation and inhibition decrease as humans  
10 age. *Can J Physiol Pharmacol* **82**, 238–248.
- 11 Klass M, Baudry S & Duchateau J (2011). Modulation of reflex responses in activated ankle  
12 dorsiflexors differs in healthy young and elderly subjects. *Eur J Appl Physiol* **111**,  
13 1909–1916.
- 14 Ko ML, King MA, Gordon TL & Crisp T (1997). The effects of aging on spinal  
15 neurochemistry in the rat. *Brain Res Bull* **42**, 95–98.
- 16 Kuo JJ, Lee RH, Johnson MD, Heckman HM & Heckman CJ (2003). Active Dendritic  
17 Integration of Inhibitory Synaptic Inputs in Vivo. *J Neurophysiol* **90**, 3617–3624.
- 18 Kurz E, Faude O, Roth R, Zahner L & Donath L (2018). Ankle muscle activity modulation  
19 during single-leg stance differs between children, young adults and seniors. *Eur J Appl*  
20 *Physiol* **118**, 239–247.
- 21 Kuznetsova A, Brockhoff PB & Christensen RHB (2017). lmerTest Package: Tests in Linear  
22 Mixed Effects Models. *J Stat Softw*; DOI: 10.18637/jss.v082.i13.
- 23 Lakens D (2013). Calculating and reporting effect sizes to facilitate cumulative science: A  
24 practical primer for t-tests and ANOVAs. *Front Psychol* **4**, 1–12.
- 25 Laughton CA, Slavin M, Katdare K, Nolan L, Bean JF, Kerrigan DC, Phillips E, Lipsitz LA  
26 & Collins JJ (2003). Aging, muscle activity, and balance control: Physiologic changes  
27 associated with balance impairment. *Gait Posture* **18**, 101–108.
- 28 Lee RH & Heckman CJ (1999). Enhancement of bistability in spinal motoneurons in vivo by  
29 the noradrenergic  $\alpha$ 1 agonist methoxamine. *J Neurophysiol* **81**, 2164–2174.
- 30 Lee RH & Heckman CJ (2000). Adjustable amplification of synaptic input in the dendrites of  
31 spinal motoneurons in vivo. *J Neurosci* **20**, 6734–6740.
- 32 Lenth R V., Buerkner P, Herve M, Love J, Riebl H & Singmann H (2021). emmeans:  
33 Estimated Marginal Means, aka Least-Squares Means - R package. Available at:  
34 <https://github.com/rvlenth/emmeans>.

- 1 Liu KY et al. (2020). Noradrenergic-dependent functions are associated with age-related  
2 locus coeruleus signal intensity differences. *Nat Commun* **11**, 1–9.
- 3 Macaluso A, Nimmo MA, Foster JE, Cockburn M, McMillan NC & Vito G de (2002).  
4 Contractile muscle volume and agonist–antagonist coactivation account for  
5 differences.pdf. *Muscle Nerve* **25**, 858–863.
- 6 Manini TM, Hong SL & Clark BC (2013). Aging and muscle: a neuron’s perspective. *Curr*  
7 *Opin Clin Nutr Metab Care* **16**, 1–10.
- 8 Masani K, Sayenko DG & Vette AH (2013). What triggers the continuous muscle activity  
9 during upright standing? *Gait Posture* **37**, 72–77.
- 10 Mcgregor KM, Zlatar Z, Kleim E, Sudhyadhom A, Bauer A, Phan S, Seeds L, Ford A,  
11 Manini TM, White KD, Kleim J & Crosson B (2011). Physical activity and neural  
12 correlates of aging: A combined TMS / fMRI study. *Behav Brain Res* **222**, 158–168.
- 13 Mesquita RNO, Taylor JL, Trajano GS, Škarabot J, Holobar A, Gonçalves BAM & Blazevich  
14 AJ (2022). Effects of reciprocal inhibition and whole–body relaxation on persistent  
15 inward currents estimated by two different methods. *J Physiol* **600**, 2765–2787.
- 16 Míguez JM, Aldegunde M, Paz-Valiñas L, Recio J & Sánchez-Barceló E (1999). Selective  
17 changes in the contents of noradrenaline, dopamine and serotonin in rat brain areas  
18 during aging. *J Neural Transm* **106**, 1089–1098.
- 19 Mildren RL, Schmidt ME, Eschelmuller G, Carpenter MG, Blouin JS & Inglis JT (2020).  
20 Influence of age on the frequency characteristics of the soleus muscle response to  
21 Achilles tendon vibration during standing. *J Physiol* **598**, 5231–5243.
- 22 Orssatto LB da R, Wiest MJ & Diefenthaeler F (2018). Neural and musculotendinous  
23 mechanisms underpinning age-related force reductions. *Mech Ageing Dev* **175**, 17–23.
- 24 Orssatto LBR, Borg DN, Blazevich AJ, Sakugawa RL, Shield AJ & Trajano GS (2021a).  
25 Intrinsic motoneuron excitability is reduced in soleus and tibialis anterior of older adults.  
26 *GeroScience* **43**, 2719–2735.
- 27 Orssatto LBR, Borg DN, Pendrith L, Blazevich AJ, Shield AJ & Trajano GS (2022a). Do  
28 motoneuron discharge rates slow with aging? A systematic review and meta-analysis.  
29 *Mech Ageing Dev* **203**, 111647.
- 30 Orssatto LBR, Mackay K, Shield AJ, Sakugawa RL, Blazevich AJ & Trajano GS (2021b).  
31 Estimates of persistent inward currents increase with the level of voluntary drive in low-  
32 threshold motor units of plantar flexor muscles. *J Neurophysiol* **125**, 1746–1754.
- 33 Orssatto LBR, Rodrigues P, Philips KM, Blazevich AJ, Borg DN, Souza TR de, Sakugawa  
34 RL, Shield AJ & Trajano GS (2022b). Intrinsic motor neurone excitability is increased



- 1 after resistance training in older adults Lucas. *SportRxiv*; DOI:  
2 <https://doi.org/10.51224/SRXIV.144>.
- 3 Orssatto LBR, Wiest MJ, Moura BM, Collins DF & Diefenthaler F (2020). Neuromuscular  
4 determinants of explosive torque: Differences among strength-trained and untrained  
5 young and older men. *Scand J Med Sci Sport* 1–9.
- 6 Pearcey GEP, Khurram OU, Beauchamp JA, Negro F & Heckman CJ (2022). Antagonist  
7 tendon vibration dampens estimates of persistent inward currents in motor units of the  
8 human lower limb. *bioRxiv*.
- 9 Polcyn AE, Kerrigan DC & Collins JJ (1998). Age-Related Changes in the Initiation of Gait:  
10 Degradation of Central Mechanisms for Momentum Generation. *Arch Phys Med Rehabil*  
11 **79**, 1582–1589.
- 12 Revall AL & Fuglevand AJ (2017). Inhibition linearizes firing rate responses in human motor  
13 units: implications for the role of persistent inward currents. *J Physiol* **595**, 179–191.
- 14 Scaglioni G, Ferri A, Minetti AE, Martin A, Hoecke JVAN & Narici M V (2012). Plantar  
15 flexor activation capacity and H reflex in older adults □: adaptations to strength training.  
16 *J Appl* **92**, 2292–2302.
- 17 Scaglioni G, Narici M V., Maffiuletti NA, Pensini M & Martin A (2003). Effect of ageing on  
18 the electrical and mechanical properties of human soleus motor units activated by the H  
19 reflex and M wave. *J Physiol* **548**, 649–661.
- 20 Shibata E, Sasaki M, Tohyama K, Kanbara Y, Otsuka K, Ehara S & Sakai A (2006). Age-  
21 related changes in locus ceruleus on neuromelanin magnetic resonance imaging at 3  
22 Tesla. *Magn Reson Med Sci* **5**, 197–200.
- 23 Škarabot J, Ansdell P, Brownstein CG, Hicks KM, Howatson G, Goodall S & Durbaba R  
24 (2019). Reduced corticospinal responses in older compared with younger adults during  
25 submaximal isometric, shortening, and lengthening contractions. *J Appl Physiol* **126**,  
26 1015–1031.
- 27 Škarabot J, Ansdell P, Howatson G, Goodall S & Durbaba R (2020). Corticospinal responses  
28 during passive shortening and lengthening of tibialis anterior and soleus in older  
29 compared to younger adults. *Exp Physiol* **105**, 419–426.
- 30 Soames RW & Atha J (1981). The role of the antigravity musculature during quiet standing  
31 in man. *Eur J Appl Physiol Occup Physiol* **47**, 159–167.
- 32 Steinbusch HWM, Dolatkah MA & A.Hopkins D (2021). Anatomical and neurochemical  
33 organization of the serotonergic system in the mammalian brain and in particular the  
34 involvement of the dorsal raphe nucleus in relation to neurological diseases. In *Progress*

- 1           *in Brain Research*, 261st edn., pp. 41–81.
- 2   Suetta C, Haddock B, Alcazar J, Noerst T, Hansen OM, Ludvig H, Kamper RS, Schnohr P,  
3       Prescott E, Andersen LL, Frandsen U, Aagaard P, Bülow J, Hovind P & Simonsen L  
4       (2019). The Copenhagen Sarcopenia Study: lean mass, strength, power, and physical  
5       function in a Danish cohort aged 20–93 years. *J Cachexia Sarcopenia Muscle* 1–13.
- 6   Swallow M (1966). Fibre size and content of the anterior tibial nerve of the foot. *J Neurol*  
7       *Neurosurg Psychiatry* **29**, 205–213.
- 8   Trajano GS, Taylor JL, Orssatto LBR, McNulty CR & Blazevich AJ (2020). Passive muscle  
9       stretching reduces estimates of persistent inward current strength in soleus motor units. *J*  
10      *Exp Biol* **223**, jeb.229922.
- 11   Udina E, D’Amico J, Bergquist AJ & Gorassini MA (2010). Amphetamine increases  
12      persistent inward currents in human motoneurons estimated from paired motor-unit  
13      activity. *J Neurophysiol* **103**, 1295–1303.
- 14   Unhjem R, Nygård M, van den Hoven LT, Sidhu SK, Hoff J & Wang E (2016). Lifelong  
15      strength training mitigates the age-related decline in efferent drive. *J Appl Physiol* **121**,  
16      415–423.
- 17   Vandenberk MS & Kalmar JM (2014). An evaluation of paired motor unit estimates of  
18      persistent inward current in human motoneurons. *J Neurophysiol* **111**, 1877–1884.
- 19   Vaughan SK, Stanley OL & Valdez G (2017). Impact of Aging on Proprioceptive Sensory  
20      Neurons and Intrafusal Muscle Fibers in Mice. *J Gerontol A Biol Sci Med Sci* **72**, 771–  
21      779.
- 22   Wei K, Glaser JI, Deng L, Thompson CK, Stevenson IH, Wang Q, Hornby TG, Heckman CJ  
23      & Kording KP (2014). Serotonin affects movement gain control in the spinal cord. *J*  
24      *Neurosci* **34**, 12690–12700.
- 25   Yu Z, Guindani M, Grieco SF, Chen L, Holmes TC & Xu X (2021). Beyond t test and  
26      ANOVA: applications of mixed-effects models for more rigorous statistical analysis in  
27      neuroscience research. *Neuron*; DOI: 10.1016/j.neuron.2021.10.030.

28  
29  
30
